# Supplementary figures and images for: Alteration of the intestinal flora may participate in the development of Graves’ disease: a study conducted among the Han population in southwest China
Source: PubMed Central journal article supplement — Endocr Connect. 2019 May 28;8(7):822–8. doi: 10.1530/EC-19-0001 (PMC6590206; doi:10.1530/ec-19-0001), 2019-05-28

## PLS-DA

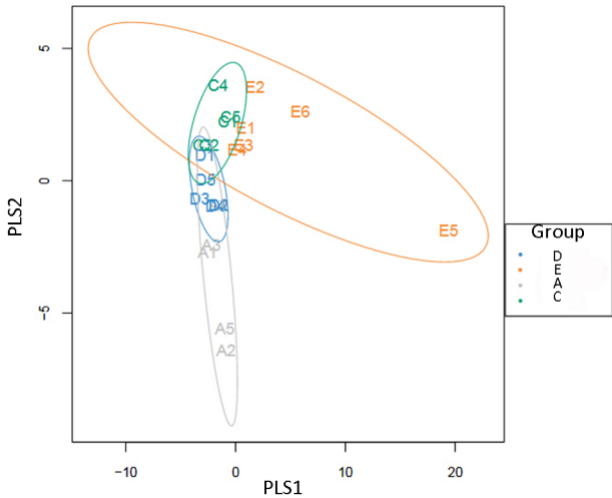

Supplement: supplementary_figure_1.pdf [file supplementary_figure_1.pdf]
